# Supplementary material for: Photochemical ageing of aerosols contributes significantly to the production of atmospheric formic acid
Source: Copernicus journal article supplement (doi:10.5194/acp-23-14813-2023), 2023-12-01
Supplement: Supplementary file 1 [file acp-23-14813-2023-supplement.pdf]

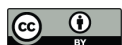

*Supplement of*

## **Photochemical ageing of aerosols contributes significantly to the production of atmospheric formic acid**

**Yifan Jiang et al.**

*Correspondence to:* Tao Wang (tao.wang@polyu.edu.hk)

The copyright of individual parts of the supplement might differ from the article licence.

1 **Table of contents**  
2  
3 **Text S1.** Sampling of aerosol filters.  
4 **Text S2.** The determination of  $J_{\text{NO}_3(\text{aq})}$  and  $J_{\text{O}_3 \rightarrow \text{O}^1\text{D}}$  in the chamber and ambient air.  
5 **Text S3.** Additional setting information on the box model simulation.  
6 **Text S4.** Additional laboratory experiments.  
7 **Text S5.** Evaluation methods of HCOOH production from photochemical aging of  
8 aerosols using the Atmospheric Tomography Mission (ATom) data.  
9  
10 **Figure S1.** The location of the observation site, Cape D’Aguilar.  
11 **Figure S2.** The variation of HCOOH sensitivity with RH.  
12 **Figure S3.** The backward trajectories of different kinds of air masses during the field  
13 campaign.  
14 **Figure S4.** The schematic diagram of the photochemical aging experiment.  
15 **Figure S5.** The sources of CH<sub>2</sub>OO in the modified case on averaged diurnal profile  
16 during the whole campaign.  
17 **Figure S6.** The sensitivity test of deposition velocity on averaged diurnal profile during  
18 the whole campaign in Scenario 4.  
19 **Figure S7.** The model results of the simulation of two weeks using bimodal physical  
20 loss rates.  
21 **Figure S8.** Comparison of simulated HCOOH concentration on 28 September using  
22 measured and simulated OVOCs values.  
23 **Figure S9.** Additional laboratory experiments show that HCOOH was produced by  
24 nitrate rather than HONO.  
25  
26 **Table S1.** The instruments and measured species or parameters in the field campaign.  
27 **Table S2.** Summary of the PM<sub>2.5</sub> sampling information.

28 **Text S1.** Sampling of aerosol filters.

29 We collected ambient aerosols at Cape D’Aguilar Super Site in Autumn for  
30 photochemical aging experiments. The PM<sub>2.5</sub> samples were collected on quartz-fiber  
31 filters (8 × 10 inches) using a PUF-1000 high-volume sampler with a flow rate of 999  
32 Lpm in 2020. All samplings were performed from 11:00 am local time (LT) to 10:00  
33 am LT of the next day. The filters were pre-fired at 900 °C for 4 hours to remove organic  
34 artifacts and stored in a freezer at -20 °C. Fractions with a given surface area from one  
35 randomized-chosen filter were used to perform the photochemical experiments or other  
36 analyses.

37

38 **Text S2.** The determination of  $J_{\text{NO}_3(\text{aq})}$  and  $J_{\text{O}_3 \rightarrow \text{O}^1\text{D}}$  in the chamber and ambient air.

39 The  $J_{\text{NO}_3(\text{aq})}$  and  $J_{\text{O}_3 \rightarrow \text{O}^1\text{D}}$  in the chamber was calculated by (Eq. (1)),

$$40 \quad J = \int q(\lambda)\sigma(\lambda)I(\lambda)d\lambda \quad (1)$$

41 where  $q(\lambda)$  is the quantum yield at wavelength  $\lambda$  (nm);  $\sigma(\lambda)$  is the cross-section at  
42 wavelength  $\lambda$ ;  $I(\lambda)$  is the flux of xenon lamp at wavelength  $\lambda$  and was calculated by  
43 converting the irradiation energy spectra of the lamp (Fig. 4d) to photon flux based on  
44 Planck's equation. The  $q(\lambda)$  and  $\sigma(\lambda)$  of aqueous nitrate at 298 K were derived from  
45 (Chu and Anastasio, 2003). The  $q(\lambda)$  and  $\sigma(\lambda)$  of O<sub>3</sub> generating O<sup>1</sup>D were adopted from  
46 the recommended value from IUPAC under 298 K ([https://uv-vis-spectral-atlas-  
47 mainz.org/uvvis/index.html](https://uv-vis-spectral-atlas-mainz.org/uvvis/index.html)). The  $J_{\text{NO}_3(\text{aq})}$  and  $J_{\text{O}_3 \rightarrow \text{O}^1\text{D}}$  in the ambient was calculated  
48 by the Tropospheric Ultraviolet and Visible (TUV) radiation model  
49 ([https://www.acom.ucar.edu/Models/TUV/Interactive\\_TUV/](https://www.acom.ucar.edu/Models/TUV/Interactive_TUV/)) under clear sky  
50 conditions and then scaled to the field-measured  $j\text{NO}_2$ .

51

52 **Text S3.** Additional setting information on the box model simulation.

53 The data of trace gases (including O<sub>3</sub>, NO, NO<sub>2</sub>, CO and SO<sub>2</sub>) and data obtained by  
54 ToF-CIMS (including HONO and N<sub>2</sub>O<sub>5</sub>) were averaged to one-hour resolution. For  
55 missing values of VOCs species, linear interpolations were applied. The missing  $J_{\text{NO}_2}$   
56 data was filled in using the data calculated by the Tropospheric Ultraviolet and Visible  
57 (TUV) Radiation Model ([https://www2.acom.ucar.edu/modeling/tropospheric-  
58 ultraviolet-and-visible-tuv-radiation-model](https://www2.acom.ucar.edu/modeling/tropospheric-ultraviolet-and-visible-tuv-radiation-model)) and then scaled using measured  $J_{\text{NO}_2}$ .  
59 Since the OVOCs data was not available during most of the modelling period, we run  
60 the model using measured VOCs concentration for three replicates to stabilise the  
61 intermediate species it generated and assumed the output concentrations of OVOCs  
62 were equal to the ambient values. We compared the simulated HCOOH concentration  
63 on 28 September where the ambient measured OVOCs data was available using  
64 modelled and measured values (Fig. S8). The uncertainty caused by using modelled  
65 OVOCs values is negligible. The methane concentration was assumed to remain

66 constant (2000 ppb; Peng et al., 2022), due to a lack of measurement data. The variable  
67 “ModelOptions.EndPointsOnly” was set to “1” because we only want the last point of  
68 each step. The “ModelOptions.LinkSteps” were set to “1” so that non-constrained  
69 species are carried over between steps. The variable “ModelOptions.IntTime” was set  
70 to “3600” meaning that the integration time for each step was 3600s. No family  
71 conservation was used. Readers are referred to a F0AM description paper for more  
72 information (Wolfe et al., 2016).

73 The biogenic emissions of HCOOH were calculated using the exponential  
74 temperature dependence algorithm of the Model of Emissions of Gases and Aerosols  
75 from Nature version 2.1 (MEGAN v2.1) (Guenther et al., 2012), as shown in (Eq. (2)).

$$76 \quad E = \varepsilon \text{LAI} \gamma_P \gamma_T \quad (2)$$

77 where E is the biogenic emission of HCOOH ( $\mu\text{g m}^{-2} \text{h}^{-1}$ );  $\varepsilon$  is the emission factor under  
78 standard environmental conditions ( $30 \mu\text{g m}^{-2} \text{h}^{-1}$ , Paulot et al. 2011); LAI is the leaf  
79 area index ( $3.65 \text{m}^2 \text{m}^{-2}$ , Myneni et al., 2021);  $\gamma_P$  and  $\gamma_T$  are the emission activity factors  
80 accounting for variability in light and temperature. In particular,  $\gamma_P$  was calculated using  
81 the PCEEA algorithm described by Guenther et al. (2006) and  $\gamma_T$  was calculated  
82 following Paulot et al. (2011).

83

84 **Text S4.** Additional laboratory experiments.

85 Since HONO and HCOOH were simultaneously observed during the photochemical  
86 aging process, it is possible that HCOOH was produced from the heterogeneous  
87 reactions between gas-phase OH radicals and particles. To check this possibility, an  
88 experiment was conducted as follows (Fig. S9). 4 Lpm HONO-containing air (78% RH,  
89 7.2 ppb HONO, balanced with zero air) was injected into the chamber. The solution  
90 was prepared with 0.15 wt.% HCHO but without adding  $\text{NaNO}_3$ . The pH of the solution  
91 was also adjusted to 2.7 using sulfuric acid. The background HCOOH concentration  
92 was determined as 308.9 ppt when illuminating the chamber without the solution. After  
93 adding the solution, the HCOOH concentration increased to 428.8 ppt. After  
94 normalizing the HONO concentration in this experiment to that in the previous solution  
95 experiments containing  $\text{NaNO}_3$  (0.77 ppb HONO, 0.62 ppb HCOOH) (Fig. 4c), the  
96 increased HCOOH concentration is 12.8 ppt, which is negligible. The conclusion is the  
97 same when compared with the filter irradiation experiments (4.1 ppb HONO, 5.6 ppb  
98 HCOOH). Therefore, the HONO photolysis contributes little to HCOOH production.

99

100 **Text S5.** Evaluation methods of HCOOH production from photochemical aging of  
101 aerosols using the Atmospheric Tomography Mission (ATom) data.

102 We first assessed the production of HCOOH from aerosols over the Pacific as an  
103 illustrative case of the remote marine boundary layer. The selected observation data

104 were obtained within the Pacific Ocean with sampling heights below 5 km. The mean  
105 values of mass concentration of PM<sub>1</sub>, the surface area density of PM<sub>1</sub>, the photolysis  
106 frequency of NO<sub>2</sub> and the mixing ratio of O<sub>3</sub> were 1 μg cm<sup>-3</sup>, 26 μm<sup>2</sup> cm<sup>-3</sup>, 0.01 s<sup>-1</sup> and  
107 24.2 ppb, respectively. The calculated mean production rate of HCOOH from aerosols  
108 (P<sub>HCOOH-a</sub>) was 6.6 ppt h<sup>-1</sup>. Considering that the proportion of nitrate in PM<sub>1</sub> was only  
109 3%, which is significantly lower than that at our site (24.3%), the actual P<sub>HCOOH-a</sub> is  
110 expected to be even lower. The small P<sub>HCOOH-a</sub> in the remote marine atmosphere is  
111 reasonable given the low concentration of HCOOH observed over the Pacific (mean:  
112 10.5 ppt; maximum: 85.6 ppt). In addition, a previous study showed small discrepancy  
113 between observed and modeled results in remote clean air masses in remote clean air  
114 masses (Chen et al., 2021).

115

116 We also assessed the HCOOH production when the remote marine boundary layer is  
117 affected by fire plumes by selecting data obtained at heights below 5 km and HCOOH  
118 concentrations higher than 1 ppb. The mean values of the mass concentration of PM<sub>1</sub>,  
119 the surface area density of PM<sub>1</sub>, the photolysis frequency of NO<sub>2</sub> and the mixing ratio  
120 of O<sub>3</sub> were 4.9 μg cm<sup>-3</sup>, 92.6 μm<sup>2</sup> cm<sup>-3</sup>, 0.011 s<sup>-1</sup> and 45.5 ppb, respectively. The  
121 resulting P<sub>HCOOH-a</sub> was 84.5 ppt h<sup>-1</sup>, significantly higher than that observed in remote  
122 marine atmosphere. After consideration of the low proportion of nitrate in PM<sub>1</sub> (5.1%),  
123 P<sub>HCOOH-a</sub> was 17.7 ppt h<sup>-1</sup> assuming a positive linear correlation between P<sub>HCOOH-a</sub> and  
124 nitrate concentration. This corresponds to a rate of 2390%/year that organic aerosol  
125 (OA) mass (3 μg cm<sup>-3</sup>) is photochemically converted to HCOOH, which is equivalent  
126 to a carbon-based HCOOH yield of ~3.8–38% over 1–10 days of aging, close to that  
127 required to account for the ATom observations (16–37%) in aged fire air masses (Chen  
128 et al., 2021).

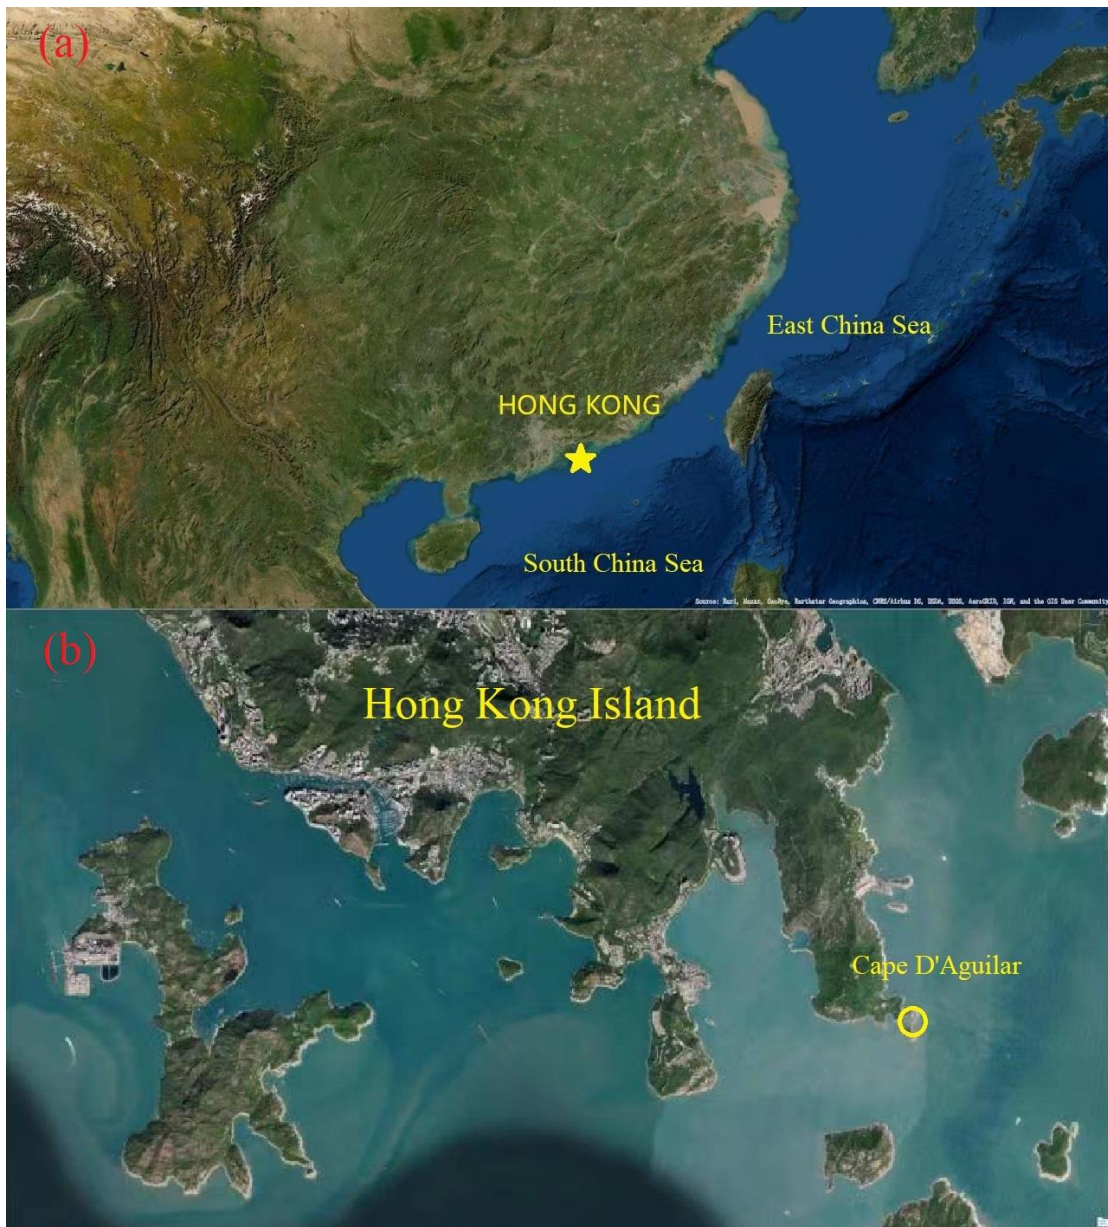

130

131 **Figure S1.** The location of the observation site, Cape D'Aguilar. (a) The location of  
132 Hong Kong in South China. (b) The field observation site in Hong Kong Island. The  
133 source is from Esri, Maxar, GeoEye, Earthstar Geographics, CNES/Airbus DS, USDA,  
134 USGS, AeroGRID, IGN, and the GIS User Community.

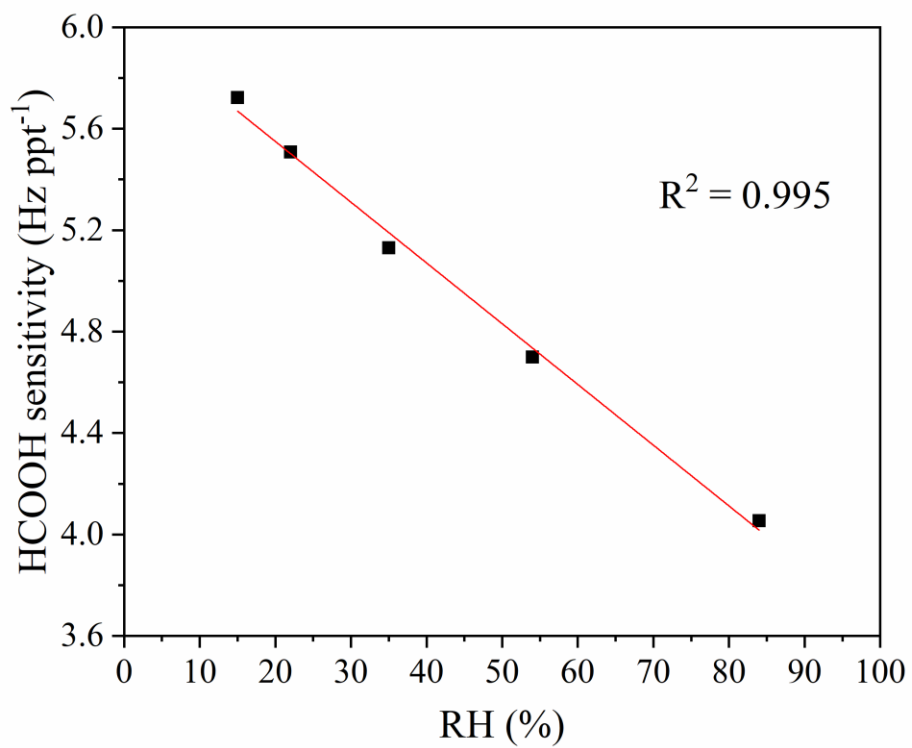

135

136 **Figure S2.** The variation of HCOOH sensitivity with RH.

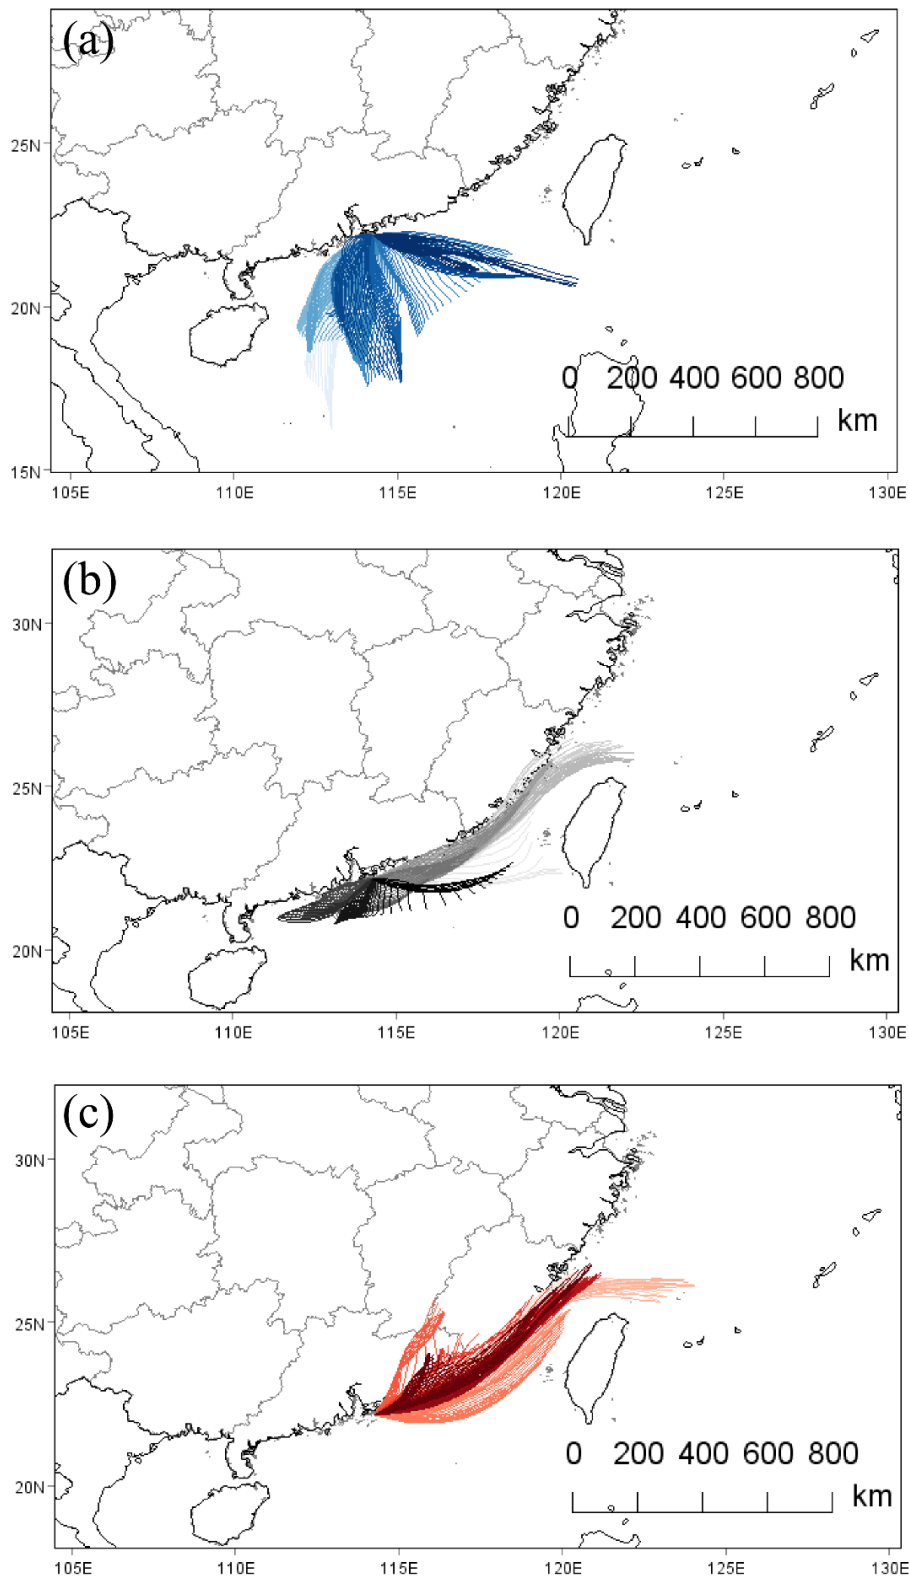

137  
 138 **Figure S3.** The backward trajectories of different kinds of air masses during the field  
 139 campaign including 24-h backward trajectories of (a) the marine air masses occurred  
 140 during 16–26 August and 11–23 September except 12, 15, and 16 September, (b) the  
 141 haze period occurred from 24 September to 2 October and (c) the coastal air masses  
 142 occurred during 4–31 October. The colour of the line deepens over time.



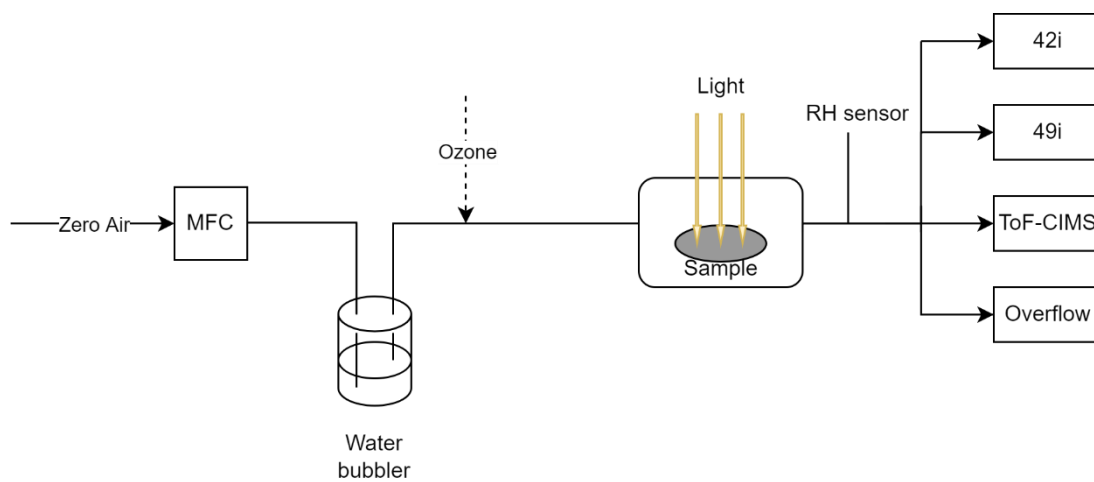

143

144 **Figure S4.** The schematic diagram of the photochemical aging experiment.

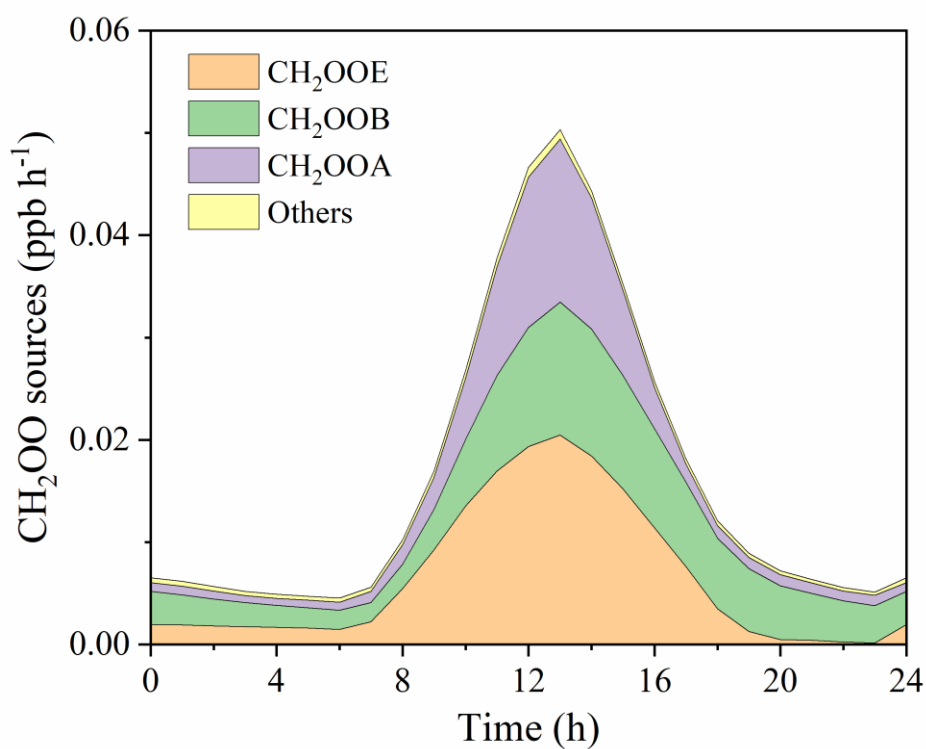

145

146 **Figure S5.** The sources of CH<sub>2</sub>OO in the modified case on averaged diurnal profile  
 147 during the whole campaign.

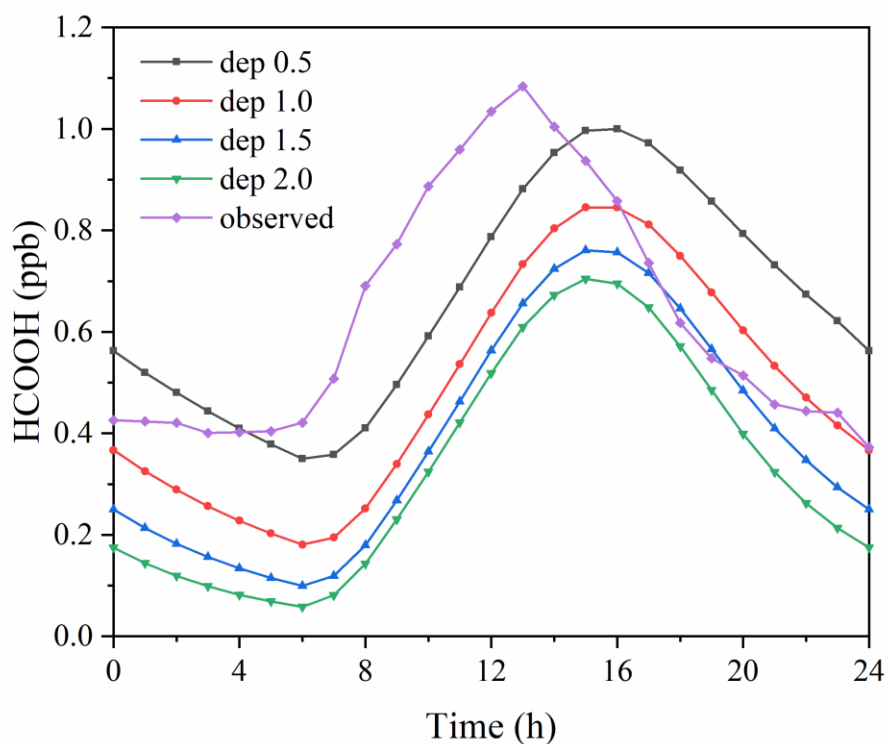

148  
 149 **Figure S6.** The sensitivity test of deposition velocity on averaged diurnal profile during  
 150 the whole campaign in Scenario 4.

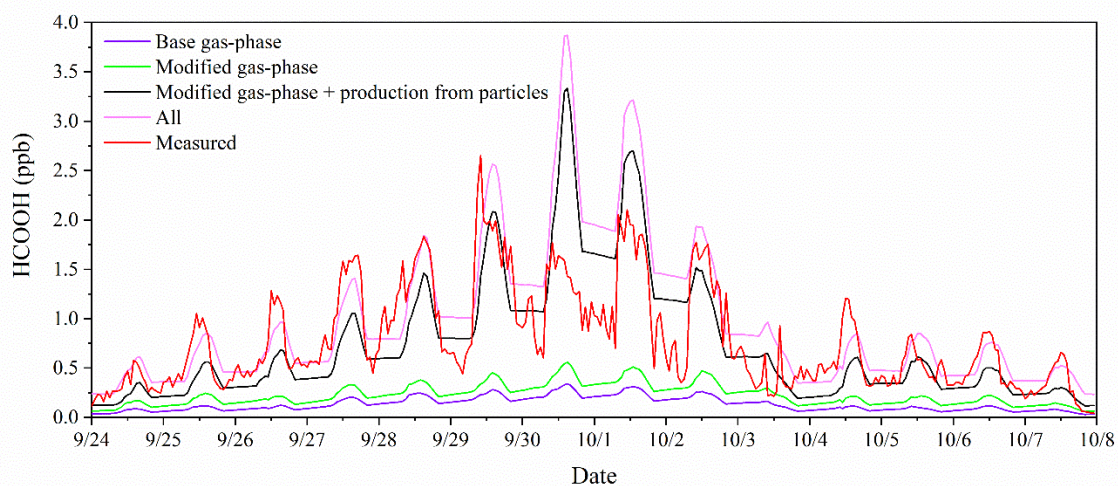

151  
 152 **Figure S7.** The model results of the simulation of two weeks using bimodal physical  
 153 loss rates.

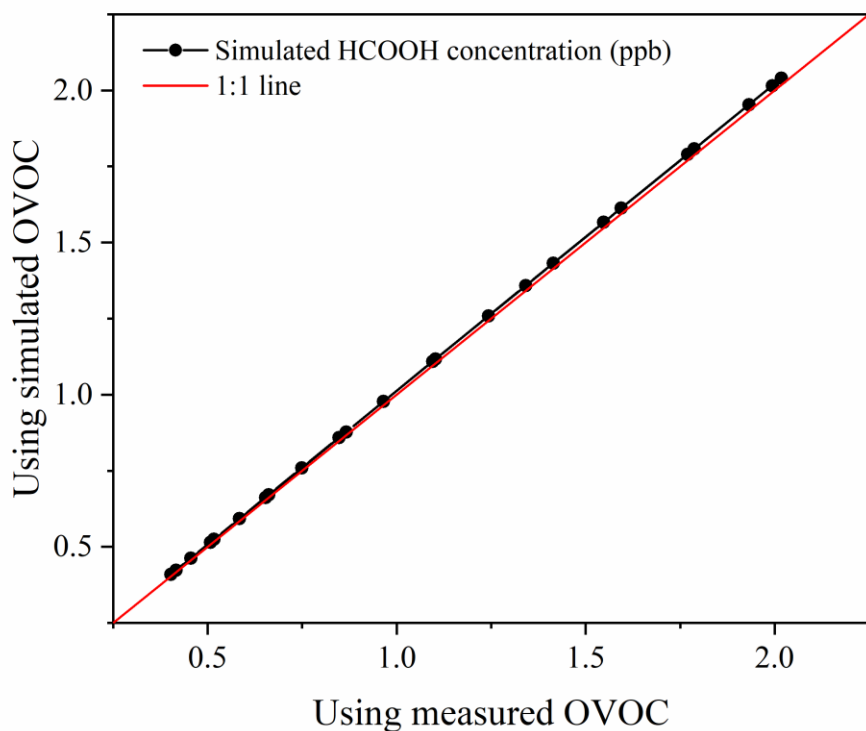

154

155 **Figure S8.** Comparison of simulated HCOOH concentration on 28 September using  
 156 measured and simulated OVOCs values.

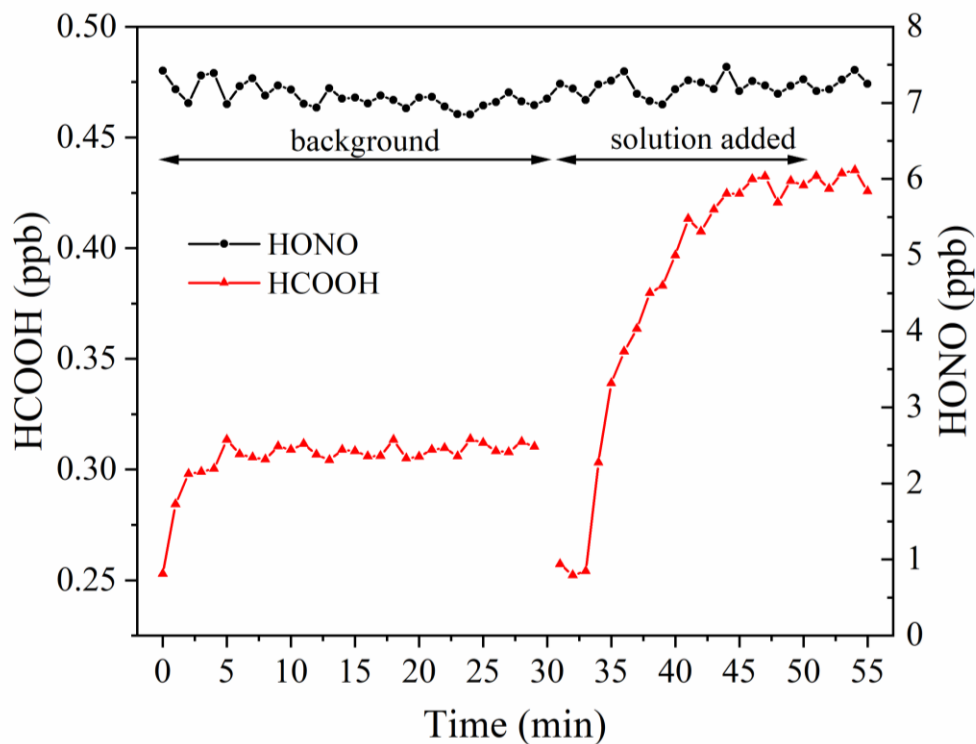

157

158 **Figure S9.** Additional laboratory experiments show that HCOOH was produced by  
 159 nitrate rather than HONO.

160

161 **Supplementary tables**162 **Table S1.** The instruments and measured species or parameters in the field campaign.

| Species                                                                                                                                                                                                                                                           | Instruments                                                                                   | Time resolution |
|-------------------------------------------------------------------------------------------------------------------------------------------------------------------------------------------------------------------------------------------------------------------|-----------------------------------------------------------------------------------------------|-----------------|
| HCOOH, HONO, N <sub>2</sub> O <sub>5</sub>                                                                                                                                                                                                                        | Iodide-ToF-CIMS,<br>Aerodyne Inc.                                                             | 1 s             |
| O <sub>3</sub>                                                                                                                                                                                                                                                    | O <sub>3</sub> analyzer, model 49i,<br>Thermo Scientific                                      | 1 min           |
| NO, NO <sub>2</sub>                                                                                                                                                                                                                                               | NO <sub>x</sub> analyzer, model 42i-<br>TL with photolytic<br>converter, Thermo<br>Scientific | 1 min           |
| CO                                                                                                                                                                                                                                                                | CO analyzer, model<br>T300U, Teledyne                                                         | 1 min           |
| SO <sub>2</sub>                                                                                                                                                                                                                                                   | SO <sub>2</sub> analyzer, model<br>T100U, Teledyne                                            | 1 min           |
| jNO <sub>2</sub>                                                                                                                                                                                                                                                  | Filter Radiometer, Metcon                                                                     | 1 min           |
| VOCs                                                                                                                                                                                                                                                              | GC-MS/FID, Chromatotec<br>Group                                                               | 1 h             |
| OVOCs                                                                                                                                                                                                                                                             | Carbonyl sampler, model<br>8000-2, ATEC<br>HPLC                                               | 3 h             |
| Particle number size<br>distribution                                                                                                                                                                                                                              | Scanning mobility particle<br>sizer, TSI                                                      | 5 min           |
| Compositions in PM <sub>2.5</sub><br>and PM <sub>10</sub> (including<br>Na <sup>+</sup> , NH <sub>4</sub> <sup>+</sup> , K <sup>+</sup> , Mg <sup>2+</sup> ,<br>Ca <sup>2+</sup> , Cl <sup>-</sup> , NO <sub>3</sub> <sup>-</sup> , SO <sub>4</sub> <sup>2-</sup> | MARGA                                                                                         | 1 h             |

163

164 **Table S2.** Summary of the PM<sub>2.5</sub> sampling information.

| Date       | RH    | Size (cm <sup>2</sup> ) | Aerosol<br>loading<br>(mg) | Dry-state<br>Surface area<br>density |
|------------|-------|-------------------------|----------------------------|--------------------------------------|
| 2020.10.07 | 72.34 | 51.6                    | 3.33                       | 192.52                               |
| 2020.10.08 | 68.39 | 53.4                    | 3.55                       | 195.89                               |
| 2020.10.26 | 78.85 | 53.4                    | 4.28                       | 119.86                               |
| 2020.11.02 | 65.68 | 56.1                    | 5.55                       | 251.79                               |

|            |       |        |      |        |
|------------|-------|--------|------|--------|
| 2020.11.03 | 69.82 | 52.51  | 4.40 | 233.81 |
| 2020.11.04 | 58.30 | 55.35  | 2.77 | 170.15 |
| 2020.11.05 | 76.32 | 53.352 | 1.95 | 134.89 |

165

166 **Reference**

167 Chu, L. and Anastasio, C.: Quantum Yields of Hydroxyl Radical and Nitrogen Dioxide  
 168 from the Photolysis of Nitrate on Ice, *Journal of Physical Chemistry A*, 107, 9594–9602,  
 169 <https://doi.org/10.1021/jp0349132>, 2003.

170 Guenther, A., Karl, T., Harley, P., Wiedinmyer, C., Palmer, P. I., and Geron, C.:  
 171 Atmospheric Chemistry and Physics Estimates of global terrestrial isoprene emissions  
 172 using MEGAN (Model of Emissions of Gases and Aerosols from Nature), *Atmos.*  
 173 *Chem. Phys*, 6, 3181–3210, 2006.

174 Guenther, A. B., Jiang, X., Heald, C. L., Sakulyanontvittaya, T., Duhl, T., Emmons, L.  
 175 K., and Wang, X.: The Model of Emissions of Gases and Aerosols from Nature version  
 176 2.1 (MEGAN2.1): an extended and updated framework for modeling biogenic  
 177 emissions, *Geosci. Model Dev*, 5, 1471–1492, [https://doi.org/10.5194/gmd-5-1471-](https://doi.org/10.5194/gmd-5-1471-2012)  
 178 2012, 2012.

179 Paulot, F., Wunch, D., Crounse, J. D., Toon, G. C., Millet, D. B., Decarlo, P. F.,  
 180 Vigouroux, C., Deutscher, N. M., Abad, G. G., Notholt, J., Warneke, T., Hannigan, J.  
 181 W., Warneke, C., De Gouw, J. A., Dunlea, E. J., De Mazière, M., Griffith, D. W. T.,  
 182 Bernath, P., Jimenez, J. L., and Wennberg, P. O.: Importance of secondary sources in  
 183 the atmospheric budgets of formic and acetic acids, *Atmos Chem Phys*, 11, 1989–2013,  
 184 <https://doi.org/10.5194/acp-11-1989-2011>, 2011.

185 Peng, X., Wang, T., Wang, W., Ravishankara, A. R., George, C., Xia, M., Cai, M., Li,  
 186 Q., Salvador, C. M., Lau, C., Lyu, X., Poon, C. N., Mellouki, A., Mu, Y., Hallquist, M.,  
 187 Saiz-Lopez, A., Guo, H., Herrmann, H., Yu, C., Dai, J., Wang, Y., Wang, X., Yu, A.,  
 188 Leung, K., Lee, S., and Chen, J.: Photodissociation of particulate nitrate as a source of  
 189 daytime tropospheric Cl<sub>2</sub>, *Nat Commun*, 13, [https://doi.org/10.1038/s41467-022-](https://doi.org/10.1038/s41467-022-28383-9)  
 190 28383-9, 2022.

191 Wolfe, G. M., Marvin, M. R., Roberts, S. J., Travis, K. R., and Liao, J.: The framework  
 192 for 0-D atmospheric modeling (F0AM) v3.1, *Geosci Model Dev*, 9, 3309–3319,  
 193 <https://doi.org/10.5194/GMD-9-3309-2016>, 2016.

194
